# Supplementary material for: More than expected: extracellular waveforms and functional responses in monkey LGN
Source: PubMed Central journal article supplement (PMC11118448; doi:10.1101/2023.11.22.568065), 2024-05-16
Supplement: NIHPP2023.11.22.568065v2-supplement-1.pdf [file NIHPP2023.11.22.568065v2-supplement-1.pdf]

807

## 808 **SUPPLEMENTARY MATERIAL**

809

### 810 **Appendix S1: Glossary**

811

812 SU, single unit: isolated extracellular recording from an individual neuron.

813 CSTRF, chromospatiotemporal receptive field: the receptive field of an LGN cell measured

814 across color and visual spaces, and through time.

815 RF, receptive field: the response of the optimal stimulus for a given cell, used

816 interchangeably with the CSTRF.

817 RF unit: a single unit with a significant receptive field.

818 STA, spike triggered average: the averaged stimulus image conditioned on spike time, here

819 used to calculate the CSTRF.

820 R, G, B; red, green, blue: the three phosphor colors used in computer monitors and, here, to

821 generate visual stimuli.

822 *Lum*, luminance matrix: determined by the magnitude of the colored phosphors.

823  $RF_{location}$ : the location of CSTRF with the maximum, from *Lum*, in *x*-space, *y*-space, and

824 time.

825 RF position: the *x* and *y* spatial components of  $RF_{location}$ .

826 RF latency: the temporal component of  $RF_{location}$ .

827  $RF_{max}$ : the spatial plane at RF latency.

- 828  $Lum_{max}$ : the luminance matrix of  $RF_{max}$ .
- 829  $RF_{noise}$ : the acausal frames of the CSTRF.
- 830  $\eta$ : noise in a signal; used to select RFs with significant amplitudes.
- 831  $L, M, S$ ; long, medium, short: retinal photoreceptor cones classified by wavelength of peak  
832 sensitivity.
- 833 M, magnocellular: RFs with contribution from  $L$ - and  $M$ -cone weights that were non-  
834 opposing.
- 835 P, parvocellular: RFs with contribution from  $L$ - and  $M$ -cone weights that were opposing and  
836 significantly above noise.
- 837 K, koniocellular: RFs with the largest contribution from  $S$ -cone.
- 838 N, non-RF unit: cells that do not have significant receptive fields.
- 839 TWF, temporal weighting function: the LMS response of a given pixel, or average pixel, over  
840 time.
- 841 Narrow 1, 2: narrow, negative-going spike waveform classifications (see Fig. 2).
- 842 Broad 1, 2: broad, negative-going spike waveform classifications (see Fig. 2).
- 843 Triphasic: negative-going spike waveform classification but typically with an addition of an  
844 initial positive deflection (see Fig. 2).
- 845 Positive 1, 2: positive-going spike waveform classifications (see Fig. 2).
- 846 Coarse stimulus: 80 x 60 colored noise stimulus.
- 847 Fine stimulus: 400 x 300 colored noise stimulus.
